# Supplementary material for: The Effect of Diet on Midgut and Resulting Changes in Infectiousness of AcMNPV Baculovirus in the Cabbage Looper, Trichoplusia ni
Source: Front Physiol. 2018 Oct 4;9:1348. doi: 10.3389/fphys.2018.01348 (PMC6180168; doi:10.3389/fphys.2018.01348)
Supplement: Supplementary file 1 [file Table_1.XLSX]

## Sheet: Supplementray Tables
Supplementary Material
The Effect of Diet on Midgut and Resulting Changes in Infectiousness of AcMNPV Baculovirus in the Cabbage Looper, Trichoplusia ni
Elizabeth Chen, Dennis Kolosov, Michael J. O’Donnell, Martin A. Erlandson, Jeremy N. McNeil, and Cam Donly*
* Correspondence: Cam Donly:cam.donly@agr.gc.ca

## Sheet: Sup. Table 1
Supplementary Table 1. All T. ni gene IDs that were analyzed by BLASTN comparison in NCBI.
HSPs = high scoring pairs
Gene ID	Number of HSPs	Lowest E-value	Accession	Description
263	1	1.82e-05	KC007344	Agrotis ipsilon clone Unigene_7733 alcohol dehydrogenase mRNA, partial cds
813	21	5.77e-112	JQ070224	Helicoverpa armigera UDP-glycosyltransferase UGT46A4 (UGT46A4) mRNA, complete cds
838	39	7.3e-169	XM_022979636	PREDICTED: Spodoptera litura cell surface glycoprotein 1-like (LOC111362874), transcript variant X6, mRNA
1352	0		not available	not available
1727	8	1.06e-60	XM_021335521	PREDICTED: Helicoverpa armigera DNA-binding protein D-ETS-6-like (LOC110376886), mRNA
2819	4	1.27e-104	XM_022975886	PREDICTED: Spodoptera litura uncharacterized LOC111360065 (LOC111360065), mRNA
2891	4	9.56e-29	XM_022958913	PREDICTED: Spodoptera litura DNA-binding protein D-ETS-6-like (LOC111348333), mRNA
2899	40	0	XM_021328186	PREDICTED: Helicoverpa armigera mucin-12-like (LOC110371797), mRNA
3024	43	0	XM_021332459	PREDICTED: Helicoverpa armigera ecdysone-induced protein 74EF (LOC110374646), transcript variant X2, mRNA
3030	32	4.31e-122	XM_021340267	PREDICTED: Helicoverpa armigera lipase 3-like (LOC110380320), mRNA
4131	130	6.29e-152	XM_022969123	PREDICTED: Spodoptera litura tyrosine-protein phosphatase non-receptor type 9-like (LOC111355326), transcript variant X6, mRNA
5184	101	0	XM_021332640	PREDICTED: Helicoverpa armigera UDP-glucuronosyltransferase 2B4-like (LOC110374776), mRNA
5946	25	5.34e-95	XM_013340429	PREDICTED: Amyelois transitella ecdysone receptor (LOC106139077), transcript variant X2, mRNA
6007	110	6.65e-112	XM_022981726	PREDICTED: Spodoptera litura juvenile hormone epoxide hydrolase-like (LOC111364717), transcript variant X2, mRNA
6343	14	8.08e-71	XM_021344799	PREDICTED: Helicoverpa armigera uncharacterized LOC110383860 (LOC110383860), mRNA
6477	6	1.88e-29	XM_022966523	PREDICTED: Spodoptera litura aspartyl/asparaginyl beta-hydroxylase (LOC111353472), transcript variant X5, mRNA
6491	128	0	XM_021331123	PREDICTED: Helicoverpa armigera probable nuclear hormone receptor HR3 (LOC110373773), transcript variant X5, mRNA
6995	100	0	XM_022963584	PREDICTED: Spodoptera litura ecdysone-inducible protein E75 (LOC111351588), transcript variant X3, mRNA
7484	73	1.36e-106	XM_021331123	PREDICTED: Helicoverpa armigera probable nuclear hormone receptor HR3 (LOC110373773), transcript variant X5, mRNA
7640	27	1.52e-16	AC239121	Bicyclus anynana clone BA_Ba68O14, complete sequence
8320	1	4.76e-21	XM_021330756	PREDICTED: Helicoverpa armigera ATP-binding cassette sub-family A member 3-like (LOC110373477), mRNA
8386	46	2.28e-97	XM_021338915	PREDICTED: Helicoverpa armigera probable chitinase 2 (LOC110379304), mRNA
8772	32	0	XM_022971630	PREDICTED: Spodoptera litura zinc finger protein on ecdysone puffs (LOC111357077), transcript variant X3, mRNA
8807	48	7.96e-95	XM_021335711	PREDICTED: Helicoverpa armigera chromatin modification-related protein eaf-1-like (LOC110377029), transcript variant X2, mRNA
8946	96	0	XM_021339180	PREDICTED: Helicoverpa armigera mucin-5AC (LOC110379490), mRNA
9056	0		not available	not available
9115	19	0	XM_021337452	PREDICTED: Helicoverpa armigera synaptic vesicle glycoprotein 2B-like (LOC110378263), mRNA
10039	162	8.1e-74	XM_021335512	PREDICTED: Helicoverpa armigera reticulon-3-B (LOC110376880), transcript variant X8, mRNA
10385	31	1.73e-78	JF999956	Helicoverpa armigera neutral lipase (Lipn004) mRNA, complete cds
10485	22	4.73e-109	XM_021331021	PREDICTED: Helicoverpa armigera tRNA dimethylallyltransferase, mitochondrial (LOC110373686), mRNA
10606	104	0	XM_022974424	PREDICTED: Spodoptera litura lipase 3-like (LOC111359008), mRNA
10695	101	5.36e-150	XM_021335521	PREDICTED: Helicoverpa armigera DNA-binding protein D-ETS-6-like (LOC110376886), mRNA
10706	30	0	XM_021330269	PREDICTED: Helicoverpa armigera cytochrome b5-like (LOC110373116), mRNA
10749	103	0	EU629216	Helicoverpa armigera glucose oxidase-like enzyme mRNA, complete cds
11096	103	0	EU325568	Helicoverpa armigera clone HaFLS01048 chitin deacetylase mRNA, partial cds
11520	97	3.48e-164	XM_022968780	PREDICTED: Spodoptera litura pancreatic triacylglycerol lipase-like (LOC111355056), mRNA
11982	61	1.08e-48	AF037196	Heliothis virescens juvenile hormone esterase precursor (JHE) mRNA, complete cds
11990	81	0	XM_022967228	PREDICTED: Spodoptera litura chitinase domain-containing protein 1 (LOC111353984), mRNA
12335	13	2.75e-177	XM_021337452	PREDICTED: Helicoverpa armigera synaptic vesicle glycoprotein 2B-like (LOC110378263), mRNA
12706	35	4.41e-39	XM_022979636	PREDICTED: Spodoptera litura cell surface glycoprotein 1-like (LOC111362874), transcript variant X6, mRNA
12888	60	9.38e-107	XM_021325697	PREDICTED: Helicoverpa armigera allantoinase-like (LOC110370010), transcript variant X2, mRNA
13031	122	0	XM_021336187	PREDICTED: Helicoverpa armigera cell surface glycoprotein 1-like (LOC110377332), transcript variant X8, mRNA
13710	130	0	XM_021326081	PREDICTED: Helicoverpa armigera synaptic vesicle glycoprotein 2C-like (LOC110370333), transcript variant X2, mRNA
13711	118	0	XM_021326080	PREDICTED: Helicoverpa armigera synaptic vesicle glycoprotein 2C-like (LOC110370333), transcript variant X1, mRNA
13714	100	1.97e-146	XM_021326081	PREDICTED: Helicoverpa armigera synaptic vesicle glycoprotein 2C-like (LOC110370333), transcript variant X2, mRNA
14408	103	0	XM_022976769	PREDICTED: Spodoptera litura gelsolin-like (LOC111360674), transcript variant X2, mRNA
15347	14	3.87e-57	XM_021325611	PREDICTED: Helicoverpa armigera probable chitinase 10 (LOC110369951), transcript variant X2, mRNA
15414	121	0	XM_021338183	PREDICTED: Helicoverpa armigera senecionine N-oxygenase (LOC110378781), transcript variant X1, mRNA
15809	108	5.63e-179	XM_021338609	PREDICTED: Helicoverpa armigera lipase 1-like (LOC110379095), mRNA
16101	104	3.13e-89	Y12273	H.armigera mRNA for putative serine protease, clone SR19, SR110
16131	100	0	GQ411189	Helicoverpa armigera chitin deacetylase 1 (cda1) mRNA, complete cds
16200	1	0.000331	HM357826	Mamestra configurata insect intestinal lipase 7 mRNA, partial cds
16201	83	6.79e-146	XM_021344704	PREDICTED: Helicoverpa armigera lipase member H-A-like (LOC110383799), mRNA
16236	248	2.09e-38	AY057052	Mamestra configurata intestinal mucin (MUCIN) mRNA, complete cds
16243	25	1.45e-96	AB201283	Mythimna separata PsChi-h mRNA for chitinase, complete cds
16258	128	0	XM_021340132	PREDICTED: Helicoverpa armigera arylphorin subunit alpha-like (LOC110380218), mRNA
16286	39	0	AF409102	Trichoplusia ni 3-dehydrecdysone 3b-reductase mRNA, complete cds
16325	85	3.64e-123	XM_021344704	PREDICTED: Helicoverpa armigera lipase member H-A-like (LOC110383799), mRNA
16372	451	8.49e-71	AF233589	Trichoplusia ni lebocin precursor, mRNA, complete cds
16375	102	0	HM357825	Mamestra configurata insect intestinal lipase 6 mRNA, complete cds
16389	7	5.74e-16	XM_013333479	PREDICTED: Amyelois transitella pancreatic triacylglycerol lipase-like (LOC106133671), mRNA
16406	121	0	L03281	Trichoplusia ni basic juvenile hormone sensitive hemolymph protein two mRNA, complete cds
16439	100	2.03e-98	MF073208	Meroptera pravella external transcribed spacer 18S ribosomal RNA gene, internal transcribed spacer 1, 5.8S ribosomal RNA gene, internal transcribes spacer 2 intergenic spacer, and 28S ribosomal RNA gene, complete sequence
16585	121	0	XM_021340132	PREDICTED: Helicoverpa armigera arylphorin subunit alpha-like (LOC110380218), mRNA
16587	100	0	KR068944	Miresa clarissa 18S ribosomal RNA gene, partial sequence
16607	23	4.33e-71	XM_022972831	PREDICTED: Spodoptera litura monoacylglycerol lipase ABHD12 (LOC111357980), transcript variant X2, mRNA
16610	0		not available	not available
16732	100	0	MF073208	Meroptera pravella external transcribed spacer 18S ribosomal RNA gene, internal transcribed spacer 1, 5.8S ribosomal RNA gene, internal transcribes spacer 2 intergenic spacer, and 28S ribosomal RNA gene, complete sequence
16887	4	1.09e-83	XM_021344622	PREDICTED: Helicoverpa armigera lipase member H-like (LOC110383755), mRNA
16983	100	1.36e-168	KU527139	Pieris melete 18S ribosomal RNA gene, partial sequence
17002	10	1.12e-17	XM_021341102	PREDICTED: Helicoverpa armigera bile salt-activated lipase-like (LOC110380941), mRNA
17013	95	1.78e-40	XM_021341964	PREDICTED: Helicoverpa armigera UDP-glucuronosyltransferase 2B14-like (LOC110381615), mRNA
17052	68	0	DQ185397	Mamestra brassicae viral-like chitinase gene, complete cds
17075				PREDICTED: lipase 1-like
17081	28	2.5e-49	XM_021331173	PREDICTED: Helicoverpa armigera pancreatic triacylglycerol lipase-like (LOC110373807), mRNA
17180	74	1.34e-58	XM_021343471	PREDICTED: Helicoverpa armigera mucin-5AC (LOC110382782), mRNA
17228	110	2.12e-62	XM_013336444	PREDICTED: Amyelois transitella juvenile hormone epoxide hydrolase-like (LOC106136015), mRNA
17396	16	1.12e-80	XM_022966211	PREDICTED: Spodoptera litura lipase 3-like (LOC111353258), mRNA
17514	20	8.58e-65	KC789752	Spodoptera frugiperda cytochrome P450 CYP321A9 mRNA, complete cds
17635	0		not available	not available
17683	22	2e-140	XM_021334511	PREDICTED: Helicoverpa armigera synaptic vesicle glycoprotein 2C-like (LOC110376132), mRNA
17700	100	0	FJ899540	Agrotis ipsilon chitinase mRNA, complete cds
17848	26	6.19e-26	XM_022969433	PREDICTED: Spodoptera litura probable cytochrome P450 6a13 (LOC111355506), mRNA
17974	70	9.61e-18	XM_013285626	PREDICTED: Papilio polytes UDP-glucuronosyltransferase 2B19-like (LOC106105332), mRNA
18023	101	1.86e-62	XM_022981416	PREDICTED: Spodoptera litura UDP-glucuronosyltransferase 2B31-like (LOC111364510), transcript variant X2, mRNA
18088	18	4.99e-76	XM_021344926	PREDICTED: Helicoverpa armigera uncharacterized LOC110383941 (LOC110383941), mRNA
18111	8	1.43e-19	XM_021332197	PREDICTED: Helicoverpa armigera uncharacterized LOC110374481 (LOC110374481), transcript variant X4, mRNA
18136	39	1.26e-07	HQ338916	Bombyx mandarina strain Suzhou 20-hydroxy-ecdysone receptor - ecdysone receptor A isoform intergenic spacer, partial sequence
18269	14	1.02e-136	KT443977	Helicoverpa armigera takeout/juvenile hormone binding-like protein mRNA, complete cds
18285	9	1.25e-21	XM_022961004	PREDICTED: Spodoptera litura endocuticle structural glycoprotein ABD-5-like (LOC111349767), mRNA
18323	92	1.84e-57	XM_022978746	PREDICTED: Spodoptera litura cytochrome P450 6k1-like (LOC111362178), mRNA
18333	78	3.11e-124	XM_022961004	PREDICTED: Spodoptera litura endocuticle structural glycoprotein ABD-5-like (LOC111349767), mRNA
18364	17	4.07e-15	XM_021341966	PREDICTED: Helicoverpa armigera UDP-glucuronosyltransferase 2B31-like (LOC110381617), mRNA
18608	9	2.62e-15	XM_022981416	PREDICTED: Spodoptera litura UDP-glucuronosyltransferase 2B31-like (LOC111364510), transcript variant X2, mRNA
18929	155	2.47e-74	XM_021335512	PREDICTED: Helicoverpa armigera reticulon-3-B (LOC110376880), transcript variant X8, mRNA
gi|687027891	607	0	XM_021325611	PREDICTED: Helicoverpa armigera probable chitinase 10 (LOC110369951), transcript variant X2, mRNA
gi|687027960	273	0	XM_022974806	PREDICTED: Spodoptera litura probable chitinase 10 (LOC111359317), mRNA
gi|687032876	376	0	XM_021330261	PREDICTED: Helicoverpa armigera piezo-type mechanosensitive ion channel component (LOC110373109), transcript variant X8, mRNA
gi|687038127	6	3.49e-05	XM_021335521	PREDICTED: Helicoverpa armigera DNA-binding protein D-ETS-6-like (LOC110376886), mRNA
gi|687040383	12	8.4e-63	XM_022961452	PREDICTED: Spodoptera litura uncharacterized LOC111350041 (LOC111350041), mRNA
gi|687040727	0		not available	not available
gi|687040850	43	7.37e-51	GQ281761	Mamestra brassicae chitin synthase 1 mRNA, complete cds
gi|687041211	100	1.64e-99	AF411258	Trichoplusia ni hormone receptor 4 (HR4) mRNA, partial cds
gi|687042275	3	8.54e-40	XM_021344810	PREDICTED: Helicoverpa armigera uncharacterized LOC110383869 (LOC110383869), mRNA
gi|687044229	24	2.83e-45	XM_021332155	PREDICTED: Helicoverpa armigera hormone receptor 4 (LOC110374445), transcript variant X5, mRNA
gi|687048759	0		not available	not available
gi|687050021	9	5.54e-47	XM_021341865	PREDICTED: Helicoverpa armigera mucin-5AC (LOC110381517), mRNA
gi|687052097	11	2.41e-12	AF037196	Heliothis virescens juvenile hormone esterase precursor (JHE) mRNA, complete cds
gi|687052737	10	1.02e-10	XM_013331629	PREDICTED: Amyelois transitella aminoacylase-1-like (LOC106132269), mRNA
gi|687056067	22	8.01e-45	DQ185397	Mamestra brassicae viral-like chitinase gene, complete cds
gi|687059532	0		not available	not available
gi|687060035	0		not available	not available
gi|687060229	15	1.02e-57	XM_021338354	PREDICTED: Helicoverpa armigera mucin-5AC-like (LOC110378911), transcript variant X2, mRNA
gi|687064266	14	9.51e-51	XM_021338354	PREDICTED: Helicoverpa armigera mucin-5AC-like (LOC110378911), transcript variant X2, mRNA
gi|687064871	24	5.62e-41	XM_021332155	PREDICTED: Helicoverpa armigera hormone receptor 4 (LOC110374445), transcript variant X5, mRNA
gi|687065638	100	1.83e-110	XM_022970422	PREDICTED: Spodoptera litura uncharacterized LOC111356160 (LOC111356160), mRNA
gi|687066127	0		not available	not available
gi|687066166	39	3.02e-69	XM_021340967	PREDICTED: Helicoverpa armigera uncharacterized LOC110380840 (LOC110380840), mRNA
gi|687066378	66	1.06e-68	XM_022961212	PREDICTED: Spodoptera litura probable nuclear hormone receptor HR3 (LOC111349888), transcript variant X12, mRNA
gi|687067156	0		not available	not available
gi|687069664	3	8.95e-27	XR_002696953	PREDICTED: Spodoptera litura uncharacterized LOC111355178 (LOC111355178), ncRNA
gi|687070335	0		not available	not available
gi|687070620	107	3.76e-133	AF411258	Trichoplusia ni hormone receptor 4 (HR4) mRNA, partial cds
gi|687072573	2	1.22e-19	XM_021337218	PREDICTED: Helicoverpa armigera carboxypeptidase B-like (LOC110378110), mRNA
gi|687073777	14	3.27e-71	XM_021338354	PREDICTED: Helicoverpa armigera mucin-5AC-like (LOC110378911), transcript variant X2, mRNA
gi|687074443	100	0	XM_021330894	PREDICTED: Helicoverpa armigera uncharacterized LOC110373584 (LOC110373584), transcript variant X2, mRNA
gi|687075186	0		not available	not available
gi|687075461	3	2.35e-38	XM_021344810	PREDICTED: Helicoverpa armigera uncharacterized LOC110383869 (LOC110383869), mRNA
gi|687078584	8	4.07e-19	XM_021338442	PREDICTED: Helicoverpa armigera pancreatic triacylglycerol lipase-like (LOC110378973), mRNA
gi|687079129	25	4.63e-69	XM_021338354	PREDICTED: Helicoverpa armigera mucin-5AC-like (LOC110378911), transcript variant X2, mRNA
gi|687080496	100	6.52e-65	XM_021338354	PREDICTED: Helicoverpa armigera mucin-5AC-like (LOC110378911), transcript variant X2, mRNA
gi|687080545	16	4.69e-54	XM_021344810	PREDICTED: Helicoverpa armigera uncharacterized LOC110383869 (LOC110383869), mRNA
gi|687081553	0		not available	not available
gi|687083130	12	9.1e-92	XM_022971723	PREDICTED: Spodoptera litura uncharacterized LOC111357141 (LOC111357141), mRNA
gi|687084284	152	0	JX077109	Mythimna separata cryptochrome 2 mRNA, complete cds
gi|687084286	246	0	JX077109	Mythimna separata cryptochrome 2 mRNA, complete cds
gi|687085342	20	3.41e-78	XM_022965401	PREDICTED: Spodoptera litura hormone receptor 4 (LOC111352728), transcript variant X7, mRNA
gi|687085460	11	5.42e-25	XM_021343929	PREDICTED: Helicoverpa armigera pancreatic triacylglycerol lipase-like (LOC110383184), mRNA
gi|687085654	0		not available	not available
gi|687085871	5	1.6e-42	XM_013340037	PREDICTED: Amyelois transitella mucin-2-like (LOC106138762), mRNA
gi|687088378	3	4.03e-28	XM_021325472	PREDICTED: Helicoverpa armigera polyhomeotic-like protein 2 (LOC110369876), mRNA
gi|687088903	105	1.95e-76	XM_021328816	PREDICTED: Helicoverpa armigera uncharacterized oxidoreductase TM_0325-like (LOC110372231), transcript variant X1, mRNA
gi|687091878	25	9.06e-22	XM_021343434	PREDICTED: Helicoverpa armigera UDP-glucuronosyltransferase 2B17-like (LOC110382752), mRNA
gi|687093538	64	0	XM_021334416	PREDICTED: Helicoverpa armigera mucin-5AC (LOC110376043), mRNA
gi|687094659	12	7.92e-62	XM_022981649	PREDICTED: Spodoptera litura probable chitinase 2 (LOC111364677), transcript variant X2, mRNA
gi|687095027	1	0.000277	LT669795	Arabis alpina genome assembly, chromosome: 8
gi|687096244	7	5.05e-64	XM_021330646	PREDICTED: Helicoverpa armigera ABC transporter A family member 2-like (LOC110373383), mRNA
gi|687097466	3	8.2e-05	HQ424180	Arctia caja clone AC1_B5 microsatellite sequence
gi|687099862	14	2.47e-148	XR_002429464	PREDICTED: Helicoverpa armigera uncharacterized LOC110375033 (LOC110375033), ncRNA
gi|687100743	37	4.57e-39	AY035785	Spodoptera littoralis ecdysone oxidase gene, complete cds
gi|687101440	0		not available	not available
gi|687101661	51	3.24e-178	XM_021326673	PREDICTED: Helicoverpa armigera inactive pancreatic lipase-related protein 1-like (LOC110370744), transcript variant X4, mRNA
gi|687103806	10	0	XM_021330646	PREDICTED: Helicoverpa armigera ABC transporter A family member 2-like (LOC110373383), mRNA
gi|687104771	9	4.1e-168	XM_021330756	PREDICTED: Helicoverpa armigera ATP-binding cassette sub-family A member 3-like (LOC110373477), mRNA
gi|687110487	2	5.35e-12	XM_021330756	PREDICTED: Helicoverpa armigera ATP-binding cassette sub-family A member 3-like (LOC110373477), mRNA
gi|687111713	45	2.19e-09	XM_021331124	PREDICTED: Helicoverpa armigera probable nuclear hormone receptor HR3 (LOC110373773), transcript variant X6, mRNA
gi|687114672	0		not available	not available
gi|687116092	25	0	XM_022975459	PREDICTED: Spodoptera litura pancreatic triacylglycerol lipase-like (LOC111359805), mRNA
gi|687116298	33	0	XM_021328023	PREDICTED: Helicoverpa armigera zonadhesin (LOC110371672), mRNA
gi|687118721	100	0	XM_021326020	PREDICTED: Helicoverpa armigera extensin (LOC110370275), mRNA
gi|687119103	8	1.82e-98	XM_021330756	PREDICTED: Helicoverpa armigera ATP-binding cassette sub-family A member 3-like (LOC110373477), mRNA
gi|687119680	0		not available	not available
gi|687121575	15	0	EU016388	Trichoplusia ni clone L581 gallerimycin mRNA, complete cds
gi|687122461	43	3.92e-55	KT948989	Mythimna separata chitin synthase A mRNA, partial cds
gi|687122464	2	1.9e-46	XM_021344799	PREDICTED: Helicoverpa armigera uncharacterized LOC110383860 (LOC110383860), mRNA
gi|687124701	100	7.52e-115	XM_021331159	PREDICTED: Helicoverpa armigera serine proteinase stubble (LOC110373798), mRNA
gi|687125436	7	8.75e-20	XM_021345348	PREDICTED: Helicoverpa armigera uncharacterized LOC110384189 (LOC110384189), transcript variant X2, mRNA
gi|687125502	4	6.73e-15	DQ875226	Helicoverpa armigera lipase mRNA, partial cds
gi|687126840	10	1.48e-47	XM_021340591	PREDICTED: Helicoverpa armigera monocarboxylate transporter 9-like (LOC110380577), mRNA
gi|687127134	0		not available	not available
gi|687128305	129	1.07e-172	XM_021335771	PREDICTED: Helicoverpa armigera lactase-phlorizin hydrolase-like (LOC110377078), mRNA
gi|687128779	87	3.07e-59	XM_021328818	PREDICTED: Helicoverpa armigera uncharacterized oxidoreductase TM_0325-like (LOC110372232), mRNA
gi|687130687	6	4.91e-43	XM_021337818	PREDICTED: Helicoverpa armigera probable chitinase 10 (LOC110378516), transcript variant X2, mRNA
gi|687131816	16	7.86e-70	XM_022972136	PREDICTED: Spodoptera litura mucin-2-like (LOC111357436), mRNA
gi|687133666	69	5.12e-59	XM_022976430	PREDICTED: Spodoptera litura 3-oxoacyl-[acyl-carrier-protein] reductase FabG-like (LOC111360478), mRNA

## Sheet: Sup. Table 2
Supplementary Table 2. Summary of RNA-Seq data before and after trimming and mapping from midguts of 4th instar T. ni raised on different diets.
Diet Sample	Total Raw Reads	Reads Remaining After Trimming	% Remaining	Average Read Length	Mapped Reads	% Mapped Reads	Uniquely Mapped Reads	% of Uniquely Mapped Reads
Artificial Biorep 1	80386252	77443284	0.9634	99.7	73318717	0.9467	63495585	0.8199
Artificial Biorep 2	79976456	77718130	0.9718	99.8	73623144	0.9473	64266561	0.8269
Artificial Biorep 3	69251276	67674296	0.9772	99.8	64348860	0.9509	56347289	0.8326
Cabbage Biorep 1	67347576	65334533	0.9701	99.8	62591997	0.958	56762565	0.8688
Cabbage Biorep 2	57847311	55430080	0.9582	99.8	53229585	0.9603	48403516	0.8732
Cabbage Biorep 3	73837403	71006689	0.9617	99.8	67998188	0.9576	61481209	0.8659
Potato Biorep 1	76250303	73155518	0.9594	99.8	70317800	0.9612	60869160	0.8321
Potato Biorep 2	69676403	66937736	0.9607	99.8	64623642	0.9654	54645189	0.8164
Potato Biorep 3	78025035	74960998	0.9607	99.8	72173224	0.9628	62851574	0.8385

## Sheet: Sup. Tables 3-5
Supplementary Table 3. Differentially expressed contigs in midguts of cabbage raised compared to artificial diet-raised 4th instar T. ni.
Gene Category	Contig ID	Max Group Mean*	Fold Change	FDR p-value	Sequence Description
Chitinase	8386	0.79	-18.24	0	PREDICTED: chitinase 2
	11990	17.63	-3.48	8.93e-12	PREDICTED: chitinase domain
	16243	11.88	-11.27	2.34e-14	PsChi-h for chitinase
	17052	14.47	-10.46	2.34e-14	viral-like chitinase
	gi|687027960	2.27	-11.07	0	chitinase 7
	gi|687056067	17.18	-10.39	4.35e-11	viral-like chitinase
	gi|687094659	180.42	-17.07	0	chitinase (Cht)
Glycoprotein	838	1.26	-3.01	7.04e-05	PREDICTED: glycoprotein 1-like
	9115	1.25	3.18	0.000104	PREDICTED: glycoprotein 2B-like
	12335	0.85	3.35	9.25e-05	PREDICTED: glycoprotein 2B-like
	12706	3	-4.25	5.98e-06	PREDICTED: glycoprotein 1-like
	13031	0.66	3.11	0.000569	PREDICTED: glycoprotein 1-like
	13710	6.21	24.62	4.52e-05	PREDICTED: glycoprotein 2C-like
	13711	23.79	31.91	1.8e-05	PREDICTED: glycoprotein 2C-like
	13714	1.68	27.93	0.000981	PREDICTED: glycoprotein 2C-like
	18285	3.52	7.69	3.6e-06	endocuticle structural glycoprotein ABD-5-like
	18333	3.47	8.22	7.71e-05	PREDICTED: glycoprotein ABD-5-like
Ecdysone Inducibles	3024	2.58	4.23	3.33e-15	PREDICTED: ecdysone-induced protein 74EF isoform A
	5946	2.13	-5.97	4.72e-05	PREDICTED: ecdysone receptor
	8772	15.74	-3.04	1.23e-09	PREDICTED: zinc finger protein on ecdysone puffs
	11211	46.66	-7.82	0	PREDICTED: ecdysteroid-regulated 16 kDa protein-like
	16286	3.31	-3.95	1.07e-05	3-dehydrecdysone 3b-reductase
	18136	10.38	-3.1	2.1e-11	20-hydroxy-ecdysone receptor - ecdysone receptor A isoform
	gi|687100743	20.36	-4.26	2.11e-10	ecdysone oxidase
Juvenile Hormone Inducibles	11982	37.19	-19.07	0	juvenile hormone esterase precursor (JHE)
	18269	1.95	-24.2	8.41e-09	juvenile hormone binding-like protein
	gi|687052097	20.2	-24.87	1.31e-13	juvenile hormone esterase precursor (JHE)
Gelsolin	14408	13.91	3.73	7.69e-12	PREDICTED: gelsolin-like
Mucins	8946	1.78	-3.91	4.33e-08	PREDICTED: mucin-2-like
	gi|687050021	1.44	-13.45	0.000813	PREDICTED: mucin-5AC
	gi|687060229	1.64	-15.91	0.000115	PREDICTED: mucin-5AC-like
	gi|687064266	3.42	-18.66	5.02e-06	PREDICTED: mucin-5AC-like
	gi|687073777	3.61	-17.05	5.94e-11	PREDICTED: mucin-5AC-like
	gi|687079129	3.03	-7.73	1.88e-05	PREDICTED: mucin-5AC-like
	gi|687080496	2.72	-12.09	9.96e-06	PREDICTED: mucin-5AC-like
	gi|687085871	0.88	5	3.41e-05	PREDICTED: mucin-2-like
Lipases	3030	1.25	7.83	4.87e-09	PREDICTED: lipase 3-like
	10606	182.7	-4.41	0	PREDICTED: lipase 3-like
	16375	173.6	-3.22	8.22e-05	insect intestinal lipase 6
	16377	190.3	3.17	3.37e-11	PREDICTED: lipase 1-like
	16607	7.74	-4.82	6.75e-12	PREDICTED: lipase ABHD12
	16887	57.19	23.05	0	PREDICTED: lipase member H-like
	17002	36.25	4.87	0	PREDICTED: bile salt-activated lipase-like
	17396	1.36	69.14	7.23e-06	PREDICTED: lipase 3-like
	gi|687078584	37.11	-26.08	0	PREDICTED: lipase-like
	gi|687085460	51.17	-20	0	PREDICTED: lipase-like
	gi|687101661	17.32	6.26	0	PREDICTED: lipase-related protein 1-like
	gi|687116092	5.47	3.5	1.26e-11	PREDICTED: lipase-like
	gi|687125502	694.91	4.64	0	lipase
*Max Group Mean = The maximum of the average group RPKM values between two group types.
Supplementary Table 4. Differentially expressed contigs in midguts of potato-raised compared to cabbage-raised 4th instar T. ni.
Gene Category	Contig ID	Max Group Mean	Fold Change	FDR p-value	Sequence Description
Chitinase	8386	3.65	-3.74	1.11e-08	probable chitinase 2
	15347	2.67	-3.26	1.26e-06	chitinase-related protein 1
	gi|687027891	0.49	-4.52	2.55e-09	chitinase-related protein 1
	gi|687094659	6.07	-4	6.04e-11	chitinase
Chitin Deacetylase	16131	7.14	-3.71	9.7e-09	chitin deacetylase 1
Ecdysone Inducibles	11211	51.31	13.67	0	PREDICTED: ecdysteroid-regulated 16 kDa protein-like
	18136	32.17	15.03	0	20-hydroxy-ecdysone receptor - ecdysone receptor A isoform
Juvenile Hormone Inducibles	4247	255.11	3.55	0	juvenile hormone epoxide hydrolase-like
	6007	26.81	-7.47	0	PREDICTED: juvenile hormone epoxide hydrolase-like
	13294	41	-5.05	0	juvenile hormone epoxide hydrolase-like
	15986	154.92	3.15	4.63e-11	juvenile hormone esterase-like
	16491	110.22	-3.43	1.35e-14	juvenile hormone-inducible protein
Mucins	16236	149.06	10.13	0	intestinal mucin
Lipases	3030	1.25	-7.09	1.82e-07	PREDICTED: lipase 3-like
	10606	1.25	-7.09	1.82e-07	PREDICTED: lipase 3-like
	15809	3273.51	3.57	2.67e-14	PREDICTED: lipase 1-like
	16200	153.46	4.29	9.51e-05	insect intestinal lipase 7
	16201	223.05	4.67	6.31e-05	insect intestinal lipase 6
	16325	211	4.11	3.14e-06	insect intestinal lipase 6
	16375	30.5	-4.66	1.02e-07	insect intestinal lipase 6
	16389	2321.25	-159.05	0	PREDICTED: lipase-like
Supplementary Table 5. Differentially expressed contigs in midguts of potato-raised compared to artificial diet-raised 4th instar T. ni.
Gene Category	Contig ID	Max Group Mean	Fold Change	FDR p-value	Sequence Description
Chitin Synthase	gi|687040850	2.85	-13.43	1.48e-06	chitin synthase 1
	gi|687122461	2.03	-13.34	5.96e-05	chitin synthase A
Chitinase	8386	115.73	-68.23	0	PREDICTED: chitinase 2
	15347	5.12	-3.71	1.77e-08	chitinase-related protein 1
	16243	11.88	-9.26	2.11e-13	PsChi-h mRNA for chitinase
	17052	14.47	-13.27	0	viral-like chitinase
	17700	4.3	-8.41	4.12e-07	chitinase mRNA
	gi|687027891	2.18	-11.57	0	chitinase-related protein 1
	gi|687027960	2.27	-14.81	0	chitinase 7
	gi|687056067	17.18	-20.17	0	viral-like chitinase
	gi|687094659	180.42	-68.27	0	chitinase
	gi|687130687	0.47	-8.18	0.000647	PREDICTED: probable chitinase 10
	gi|687131816	6.23	-3.82	9.37e-13	PREDICTED: endochitinase A1-like
Chitin Deacetylase	11096	27.73	-5.71	0	chitin deacetylase
	16131	25.48	-7.66	0	chitin deacetylase 1
Glycoprotein	12706	3	-4.34	3.81e-06	PREDICTED: glycoprotein 1-like
	13710	9.87	34.22	5.68e-06	PREDICTED: glycoprotein 2C-like
	13711	35.74	41.97	3.35e-06	PREDICTED: glycoprotein 2C-like
	18285	3.52	6.98	0.000225	PREDICTED: endocuticle structural glycoprotein ABD-5-like
Ecdysone Inducibles	3024	2.61	3.93	5.81e-12	PREDICTED: ecdysone-induced protein 74EF isoform A
	6995	40.12	-4.55	0.000149	ecdysteroid-induced (E75)
	5946	2.13	-4.15	0.000638	PREDICTED: ecdysone receptor
	16286	3.31	-6.41	1.27e-09	3-dehydrecdysone
	17683	0.3	5.74	0.000694	PREDICTED: glycoprotein 2C-like
	18136	32.17	4.85	0	20-hydroxy-ecdysone receptor
	gi|687100743	20.36	-4.19	2.37e-10	ecdysone oxidase
Juvenile Hormone Inducibles	6007	67.5	-10.89	0	PREDICTED: juvenile hormone epoxide hydrolase-like
	11982	37.19	-26.82	0	juvenile hormone esterase precursor (JHE)
	14365	7.07	-5811.56	1.19e-05	juvenile hormone esterase-like; PREDICTED: esterase B1-like
	16406	0.19	-8.01	8.38e-05	juvenile hormone sensitive hemolymph protein
	16491	215.29	-3.96	0	juvenile hormone-inducible protein
	17075	500.51	-5.25	0	juvenile hormone esterase-like
	17228	0.59	-25.24	9.61e-08	PREDICTED: juvenile hormone epoxide hydrolase-like
	18269	1.95	-78.03	5.64e-08	juvenile hormone binding-like protein
	gi|687052097	20.2	-35.21	0	juvenile hormone esterase precursor (JHE)
Mucins	2899	0.44	-7.6	1.75e-12	PREDICTED: mucin-12-like
	8946	1.78	-6.1	1.32e-13	PREDICTED: mucin-2-like
	16236	149.06	11	0	intestinal mucin
	16269	150.99	10.24	0	insect intestinal mucin 2
	17180	1.16	-7.66	6.59e-05	PREDICTED: mucin-5AC
	gi|687060229	1.64	-19.12	3.34e-05	PREDICTED: mucin-5AC-like
	gi|687064266	3.42	-13.48	1.21e-06	PREDICTED: mucin-5AC-like
	gi|687073777	3.61	-9.56	1.19e-09	PREDICTED: mucin-5AC-like
	gi|687079129	3.03	-9.53	2.04e-06	PREDICTED: mucin-5AC-like
	gi|687080496	2.72	-5.29	0.00018	PREDICTED: mucin-5AC-like
	gi|687093538	0.69	-12.24	7.7e-07	PREDICTED: mucin-5AC
Lipases	10385	644.96	-3.12	1.04e-05	lipase (Lipn004)
	10606	182.7	-25.56	0	PREDICTED: lipase 3-like
	11520	529.59	-3.16	2.34e-05	PREDICTED: lipase-like
	15809	3273.51	3.64	1.33e-14	PREDICTED: lipase 1-like
	16375	173.6	-15.02	0	insect intestinal lipase 6
	16377	446.23	6.75	0	PREDICTED: lipase 1-like
	16389	2471.87	-95.92	0	PREDICTED: lipase-like
	16607	7.74	-4.62	7.61e-12	PREDICTED: lipase ABHD12
	16887	131.13	48.17	0	PREDICTED: lipase member H-like
	17002	24.82	3.05	1.64e-11	PREDICTED: bile salt-activated lipase-like
	17081	189.62	-3.57	4.67e-07	PREDICTED: lipase-like
	17396	0.8	35.14	0.000344	PREDICTED: lipase 3-like
	gi|687101661	12.1	4.05	0	PREDICTED: lipase-related protein 1-like
	gi|687116092	6.14	3.64	2.25e-12	PREDICTED: lipase-like

## Sheet: Sup. Tables 6-8
Supplementary Table 6. Top 50 differentially expressed contigs in midguts of potato-raised compared to cabbage-raised 4th instar T.ni.
Contig ID	Max Group Mean	Fold Change	FDR p-value	Sequence Description
10039	12.57	-3922.67	3.66e-05	PREDICTED: reticulon-3-B
18323	2006.68	-3567.27	0	PREDICTED: cytochrome P450 6k1-like
10485	8.4	-3376.69	2.46e-05	PREDICTED: dimethylallyltransferase, mitochondrial
gi|687104771	6.99	3114	0.000108	PREDICTED: ATP-binding cassette sub-family A member 3-like
5184	46.64	-3015.11	0	PREDICTED: UDP-glucuronosyltransferase 2B4-like
17848	1464.79	-1896.21	0	PREDICTED: cytochrome P450 6a13
gi|687040727	50.88	-1467.35	0	not available
gi|687096244	6.7	1289.23	0.000893	PREDICTED: ABC transporter A family member 2-like
15414	25.49	1138.81	0	PREDICTED: senecionine N-oxygenase
18929	12.9	-1085.29	6.57e-11	PREDICTED: reticulon-3-B
17635	180.12	-1079.85	0	not available
16610	1086.64	-1052.15	0	not available
17514	2199.97	-880.63	0	cytochrome P450 CYP321A9
16439	5485.97	-669.14	0	external transcribed spacer 18S ribosomal RNA
gi|687078584	556.87	607.9	0	PREDICTED: pancreatic triacylglycerol lipase-like
gi|687075186	718.46	483.68	0	not available
gi|687085460	774.08	468.07	0	PREDICTED: pancreatic triacylglycerol lipase-like
gi|687069664	18.05	449.21	0	uncharacterized
gi|687119103	10.67	432.37	0	PREDICTED: ATP-binding cassette sub-family A member 3-like
2891	39.39	420.36	0	PREDICTED: DNA-binding protein D-ETS-6-like
gi|687125436	1112.45	-393.89	0	uncharacterized
gi|687038127	18.39	387.95	0	PREDICTED: DNA-binding protein D-ETS-6-like
8320	6.32	373.17	0	PREDICTED: ATP-binding cassette sub-family A member 3-like
10706	68.93	370.49	0	PREDICTED: cytochrome b5-like
263	38.36	366.43	0	alcohol dehydrogenase
gi|687127134	14.07	352.04	0	not available
10695	14.8	349.06	0	PREDICTED: DNA-binding protein D-ETS-6-like
18364	48.92	-313.33	0	PREDICTED: UDP-glucuronosyltransferase 2B31-like
gi|687121575	13.43	311.51	0	gallerimycin mRNA
17013	256.26	-296.64	0	PREDICTED: UDP-glucuronosyltransferase 2B14-like
16983	658.95	-288.86	0	18S ribosomal RNA gene
17974	208.31	-283	0	PREDICTED: UDP-glucuronosyltransferase 2B19-like
1727	2.38	278.24	3.95e-14	PREDICTED: DNA-binding protein D-ETS-6-like
18023	219.8	-265.8	0	PREDICTED: UDP-glucuronosyltransferase 2B31-like
gi|687114672	121.34	233.82	0	not available
18111	18.8	-188.84	0	uncharacterized
gi|687048759	7.64	-182.14	1.27e-11	not available
gi|687070335	0.9	176.15	5.71e-07	not available
gi|687119680	0.34	-170	5.63e-07	not available
16389	2321.25	-159.05	0	PREDICTED: pancreatic triacylglycerol lipase-like
7640	1.01	157.24	0	clone BA_Ba68O14
18608	19.69	-150.94	1.49e-10	PREDICTED: UDP-glucuronosyltransferase 2B31-like
gi|687067156	10.16	-145.25	6.27e-13	not available
gi|687133666	4.48	-143.94	0	PREDICTED: 3-oxoacyl-[acyl-carrier-protein] reductase FabG-like
gi|687081553	3.3	-143.39	1.42e-06	not available
16587	201.07	141.75	0	18S ribosomal RNA gene
gi|687097466	1.54	136.54	2.2e-06	clone AC1_B5 microsatellite sequence
gi|687103806	4.08	132.05	0	PREDICTED: ABC transporter A family member 2-like
gi|687110487	6.75	127.68	2.2e-10	PREDICTED: ATP-binding cassette sub-family A member 3-like
Supplementary Table 7. Top 50 differentially expressed contigs in midguts of cabbage-raised compared to artificial diet-raised 4th instar T.ni.
Contig ID	Max Group Mean	Fold Change	FDR p-value	Sequence Description
8807	5.43	4710.44	3.69e-06	PREDICTED: chromatin modification-related protein eaf-1-like
11607	10.42	-2043.91	0.000188	rna-binding protein 1 isoform x3
gi|687032876	0.57	-1344.53	0.000472	PREDICTED: piezo-type mechanosensitive ion channel component
16439	5485.97	994.23	0	external transcribed spacer 18S ribosomal RNA gene
4131	0.53	856.88	0.00045	PREDICTED: tyrosine-protein phosphatase non-receptor type 9-like
gi|687083130	25.47	-660.96	2.1e-11	uncharacterized
gi|687095027	1.34	647.25	0.000954	genome assembly, chromosome: 8
16585	14.1	-640.74	0	PREDICTED: arylphorin subunit alpha-like
16441	1404.47	-507.53	0	epididymal secretory protein e1-like
18088	32.34	-375.87	0	uncharacterized
gi|687111713	6.76	-344.95	8.17e-09	PREDICTED: nuclear hormone receptor HR3
gi|687066127	34.14	-327.14	0	not available
16750	122.57	-311.51	0	facilitated trehalose transporter tret1-like
16983	658.95	311.49	0	18S ribosomal RNA gene
9056	5.77	-294.36	8.64e-09	not available
7484	23.73	-286.72	0	PREDICTED: probable nuclear hormone receptor HR3
15414	9.46	-266	0	PREDICTED: senecionine N-oxygenase
gi|687085342	53.06	-248.77	0	PREDICTED: hormone receptor 4
gi|687126840	23.06	-227.88	0	PREDICTED: monocarboxylate transporter 9-like
10749	12.66	226.78	0	glucose oxidase-like enzyme mRNA
5184	46.64	226.24	0	PREDICTED: UDP-glucuronosyltransferase 2B4-like
gi|687042275	16.25	-224.63	3.84e-13	uncharacterized
gi|687124701	3.92	-220.6	8.65e-08	PREDICTED: serine proteinase stubble
16372	2485.31	217.17	0	lebocin precursor
gi|687066166	21.64	-216.92	4.2e-13	uncharacterized
gi|687070620	36.77	-200.93	0	hormone receptor 4 (HR4) mRNA
gi|687085654	13.06	190.97	0	not available
2819	1.6	-189.59	2.11e-07	uncharacterized
gi|687122464	21.16	-178.08	0	uncharacterized
16101	6335.94	174.25	0	putative serine protease
12888	19.49	-173.9	0	PREDICTED: allantoinase-like
gi|687128779	2.61	171.29	7.78e-14	PREDICTED: uncharacterized oxidoreductase TM_0325-like
gi|687118721	46.93	-163.53	0	PREDICTED: extensin
gi|687044229	25.63	-161.76	0	PREDICTED: hormone receptor 4
gi|687040727	50.88	157.98	0	not available
gi|687075461	21.27	-155.57	0	uncharacterized
gi|687041211	22.32	-152.29	0	hormone receptor 4 (HR4) mRNA
gi|687052737	6.84	-147.78	7.77e-07	PREDICTED: aminoacylase-1-like
gi|687088903	24.93	141.11	0	PREDICTED:uncharacterized oxidoreductase TM_0325-like
gi|687074443	45.3	-135	0	uncharacterized
gi|687128305	1375.86	114.6	0	PREDICTED: lactase-phlorizin hydrolase-like
16608	501.16	-112.33	0	not available
gi|687091878	9.8	-109.2	4.43e-11	PREDICTED: UDP-glucuronosyltransferase 2B17-like
gi|687064871	5.8	-109.12	1.65e-07	PREDICTED: hormone receptor 4
gi|687099862	0.09	108.92	3.88e-07	uncharacterized
16587	242.16	-107.61	0	18S ribosomal RNA gene
6477	57.78	106.87	0	PREDICTED: aspartyl/asparaginyl beta-hydroxylase
6491	138.08	-101.14	0	PREDICTED: probable nuclear hormone receptor HR3
gi|687066378	9.46	-100.66	1.84e-13	PREDICTED: probable nuclear hormone receptor HR3
Supplementary Table 8. Top 50 differentially expressed contigs in midguts of potato-raised compared to artificial diet-raised 4th instar T.ni.
Contig ID	Max Group Mean	Fold Change	FDR p-value
14365	7.07	-5811.56	1.19e-05	juvenile hormone esterase-like
4131	2.18	3310.68	1.44e-05	PREDICTED: tyrosine-protein phosphatase non-receptor type 9-like
gi|687065638	25.11	-2957.4	2.43e-05	uncharacterized
8807	2.76	2203.8	4.28e-05	PREDICTED: chromatin modification-related protein eaf-1-like
16585	14.1	-1751.48	0	PREDICTED: arylphorin subunit alpha-like
gi|687075461	21.27	-1629.63	0.000129	uncharacterized
gi|687066166	21.64	-1621.14	0.000127	uncharacterized
gi|687032876	0.57	-1452.86	0.00017	PREDICTED: piezo-type mechanosensitive ion channel component
gi|687084284	0.41	1296.74	0.000225	cryptochrome 2 mRNA
gi|687080545	4.58	-1180.27	0.000297	uncharacterized
gi|687122464	21.16	-1135.73	1.22e-13	uncharacterized
7484	23.73	-1094.86	0	PREDICTED: probable nuclear hormone receptor HR3
gi|687066127	34.14	-954.67	4.08e-13	not available
gi|687070620	36.77	-938.01	3.97e-13	hormone receptor 4 (HR4) mRNA
gi|687084286	0.25	876.19	0.000613	cryptochrome 2 mRNA
2819	1.6	-811.84	0.000759	uncharacterized
gi|687083130	25.47	-784.14	3.09e-12	uncharacterized
gi|687040383	31.39	-709.78	2.43e-09	uncharacterized
gi|687116298	1.85	-483.69	1.86e-10	PREDICTED: zonadhesin
813	31.2	-473.75	0	UDP-glycosyltransferase UGT46A4
gi|687118721	46.93	-464.48	0	PREDICTED: extensin
6343	6.17	-443.63	3.9e-10	uncharacterized
gi|687111713	6.76	-402.04	1.52e-09	PREDICTED: probable nuclear hormone receptor HR3
16258	3.07	-364.36	1.33e-14	PREDICTED: arylphorin subunit alpha-like
gi|687044229	25.63	-358.33	0	PREDICTED: hormone receptor 4
9056	5.77	-346.02	1.69e-09	not available
gi|687085342	53.06	-294.55	0	PREDICTED: hormone receptor 4
6491	138.08	-289.31	0	PREDICTED: probable nuclear hormone receptor HR3
16750	122.57	-281.01	0	facilitated trehalose transporter tret1-like
gi|687042275	16.25	-269.78	3.87e-14	uncharacterized
gi|687041211	22.32	-258.58	5.11e-14	hormone receptor 4 (HR4)
gi|687124701	3.92	-257.43	1.85e-08	PREDICTED: serine proteinase stubble
18088	32.34	-241.89	0	uncharacterized
18929	4.21	-206.7	1.73e-06	PREDICTED: reticulon-3-B
gi|687074443	45.3	-201.9	0	uncharacterized
1352	2.82	191.13	0	not available
2424	48.98	-181.28	0	beta-hexosaminidase subunit beta-like
gi|687038127	18.39	161.34	0	PREDICTED: DNA-binding protein D-ETS-6-like
gi|687125436	754.22	-152.21	0	uncharacterized
18364	39.53	-148.32	0	PREDICTED: UDP-glucuronosyltransferase 2B31-like
gi|687060035	42.58	-138.95	0	not available
gi|687088378	12.8	-138.14	7.48e-14	PREDICTED: polyhomeotic-like protein 2
gi|687133666	6.99	-133.61	0	PREDICTED: 3-oxoacyl-[acyl-carrier-protein] reductase FabG-like
gi|687072573	5.97	-133.44	1.78e-06	PREDICTED: carboxypeptidase B-like
gi|687091878	9.8	-130.24	3.7e-10	PREDICTED: UDP-glucuronosyltransferase 2B17-like
gi|687101440	1.5	130.19	2.97e-06	not available
16732	220.75	128.69	1.2e-05	external transcribed spacer 18S ribosomal RNA gene
2891	39.39	123.4	0	PREDICTED: DNA-binding protein D-ETS-6-like
gi|687059532	4.91	-123.16	2.84e-06	not available
